# Supplementary material for: The antimicrobial activity of fruits from some cultivar varieties of Rubus idaeus and Rubus occidentalis
Source: Royal Society of Chemistry journal article supplement (doi:10.1039/c4fo00129j), 2014-01-01
Supplement: c4fo00129j1.pdf [file c4fo00129j1.pdf]

### HPLC-DAD/ESI-MS identification of the compounds from the fruits of *R. idaeus* and *R. occidentalis*

In the optimized HPLC conditions, 12 anthocyanin standard compounds and sanguin H-6 were resolved. However, delphinidin 3-O-glucoside and pelargonidin 3,5-di-O-glucoside could not be separated and the resolution of cyanidin 3-O-sambubioside and cyanidin 3-O-glucoside was not satisfactory (Tab. 1, Fig. 1).

In *R. occidentalis* 'Litacz' an unknown compound was found eluting at  $t_R$  18,1 min ( $C_1$ ), which was identified basing on UV and MS spectra, as cyanidin 3-O-(2<sup>G</sup>-xylosylrutinoside) ( $C_1$ ) (Tab. 1).

In cultivars 'Ljulin' and 'Veten' an unknown compound ( $C_2$ ) was found eluting at  $t_R$  17,7 min, and was identified, on the basis of UV and MS spectra, as pelargonidin 3-O-sophoroside ( $C_2$ ) (Tab. 1).

### Validation of HPLC methods used for quantitative analysis of the compounds in the fruit extracts of *R. idaeus* and *R. occidentalis*

The developed HPLC method for purposes of quantitative analysis was validated by determining the calibration curves, linear regression, PLOQ and recovery of biologically active compounds (Tab. 2), except pelargonidin 3-O-sophoroside and cyanidin 3-O-(2<sup>G</sup>-xylosylrutinoside), which amount was calculated corresponding to cyanidin 3-O-glucoside. In *R. occidentalis* 'Litacz' cyanidin 3-O-sambubioside and cyanidin 3-O-glucoside could not be separated (Figure 1), therefore their content was determined using HPLC-ESI-MS (Tab. 3).

**Figure 1.** HPLC chromatogram of the mixture of standard compounds: UV detection, A:  $\lambda = 280$  nm, B:  $\lambda = 520$  nm

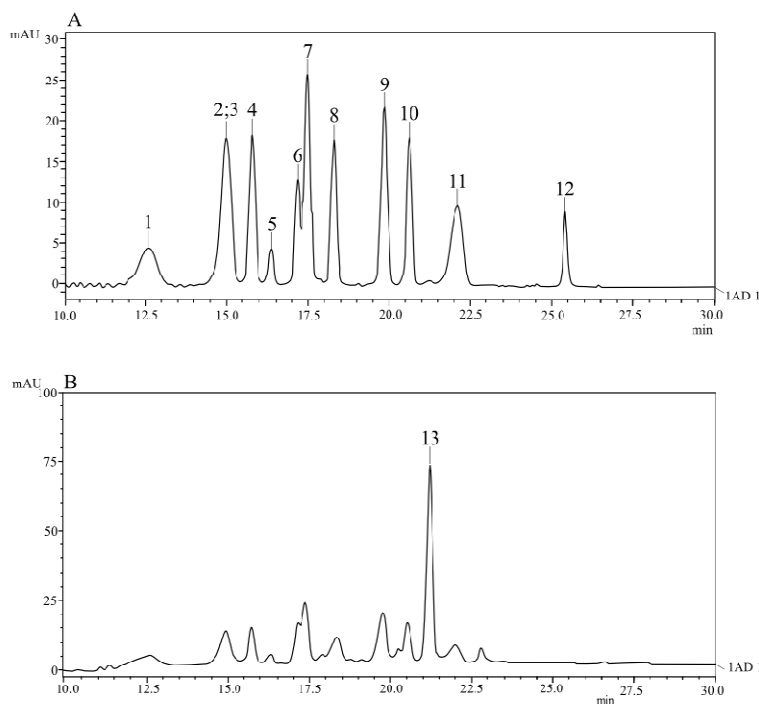

**Table 1.** HPLC-DAD/ESI-MS data of the compounds identified in the fruits of *R. idaeus* and *R. occidentalis*

| HPLC peak | Compounds                                         | $t_R$ (min) | $\lambda_{max}$ (nm) | $M^{+/-}$ (m/z)   | Fragment ions (m/z)                 |
|-----------|---------------------------------------------------|-------------|----------------------|-------------------|-------------------------------------|
| 1         | cyanidin 3,5-di-O-glucoside                       | 12.6        | 276, 513             | 611 <sup>+</sup>  | 287 <sup>+</sup>                    |
| 2         | delphinidin 3-O-glucoside                         | 14.9        | 274, 523             | 465 <sup>+</sup>  | 303 <sup>+</sup>                    |
| 3         | pelargonidin 3,5-di-O-glucoside                   | 14.9        | 269, 496             | 596 <sup>+</sup>  | 271 <sup>+</sup>                    |
| 4         | cyanidin 3-O-sophoroside                          | 15.7        | 279, 514             | 611 <sup>+</sup>  | 287 <sup>+</sup>                    |
| 5         | cyanidin 3-O-(2 <sup>G</sup> -glucosylrutinoside) | 16.3        | 279, 518             | 757 <sup>+</sup>  | 287 <sup>+</sup>                    |
| 6         | cyanidin 3-O-sambubioside                         | 17.1        | 280, 517             | 581 <sup>+</sup>  | 287 <sup>+</sup>                    |
| 7         | cyanidin 3-O-glucoside                            | 17.4        | 279, 517             | 449 <sup>+</sup>  | 287 <sup>+</sup>                    |
| 8         | pelargonidin 3-O-rutinoside                       | 18,3        | 279, 517             | 595 <sup>+</sup>  | 287 <sup>+</sup>                    |
| 9         | pelargonidin 3-O-glucoside                        | 19.8        | 269, 504             | 433 <sup>+</sup>  | 271 <sup>+</sup>                    |
| 10        | pelargonidin 3-O-rutinoside                       | 20.6        | 275, 502             | 579 <sup>+</sup>  | 271 <sup>+</sup>                    |
| 11        | malvinidin 3-O-glucoside                          | 22.1        | 274, 527             | 493 <sup>+</sup>  | 331 <sup>+</sup>                    |
| 12        | cyanidin                                          | 25.4        | 273, 523             | 287 <sup>+</sup>  |                                     |
| 13        | sanguin H6                                        | 21.3        | 206, 251             | 1870 <sup>-</sup> | 934 <sup>-</sup> , 935 <sup>-</sup> |
| $C_1$     | cyanidin 3-O-(2 <sup>G</sup> -xylosylrutinoside)  | 18.1        | 279, 517             | 727 <sup>+</sup>  | 287 <sup>+</sup>                    |
| $C_2$     | pelargonidin 3-O-sophoroside                      | 17.7        | 279, 504             | 595 <sup>+</sup>  | 271 <sup>+</sup>                    |

| <b>Table 2.</b> Validation parameters of the developed HPLC method for quantitative analysis of anthocyanins in the fruits |                                |                |               |            |
|----------------------------------------------------------------------------------------------------------------------------|--------------------------------|----------------|---------------|------------|
| Compounds                                                                                                                  | Calibration curve              | R <sup>2</sup> | PLOQ (µg/1ml) | Recovery   |
| cyanidin 3,5-diglucoside                                                                                                   | y=0.000221148*x+0.760168       | 0.999          | 1.0           | 104.6±5.2  |
| cyanidin 3-O-sophoroside                                                                                                   | y=0.000166372*x+0.157799       | 0.999          | 0.75          | 108.1±3.9  |
|                                                                                                                            | y=0.000150383*x+1.45536        | 0.999          |               |            |
| cyanidin 3-O(2 <sup>G</sup> -glucosylrutinoside)                                                                           | y=0.00011316*x+0.01275         | 0.999          | 0.5           | 99.6±8.2   |
|                                                                                                                            | y=0.000112415*x+0.11805        | 0.999          |               |            |
| cyanidin 3-O-sambubioside                                                                                                  | y=0.000267489*<br>x-0.00044298 | 0.999          | 1.0           | 102.8±2.7  |
| cyanidin 3-O-glucoside                                                                                                     | y=0.00011316*x+0.01275         | 0.999          | 0.5           | 99.6±8.2   |
|                                                                                                                            | y=0.000112415*x+0.11805        | 0.999          |               |            |
| cyanidin 3-O-rutinoside                                                                                                    | y=0.000381367*x+0.189157       | 0.999          | 1.5           | 98.6±5.2   |
|                                                                                                                            | y=0.000330891*x+3.96089        | 0.999          |               |            |
| pelargonidin 3-O-glucoside                                                                                                 | y=0.000140779*x+0.646178       | 0.999          | 0.75          | 103.8±4.5  |
| pelargonidin 3-O-rutinoside                                                                                                | y=0.000177942*x+0.287662       | 0.999          | 0.75          | 104.9±6.9  |
| cyanidin                                                                                                                   | y=0.0000563588*x+ 0.00621106   | 0.996          | 0.2           | 113.4±16.8 |
| sanguin H6                                                                                                                 | y=0.000575157*x+5.52713        | 0.999          | 1.5           | 94.3±4.9   |

\*PLOQ – pooled limit of quantification

| <b>Table 3.</b> Validation parameters of HPLC-ESI-MS method for quantitative analysis of cyanidin 3-O-sambubioside and cyanidin 3-O-glucoside in the fruits of <i>R. occidentalis</i> |                       |                |               |            |
|---------------------------------------------------------------------------------------------------------------------------------------------------------------------------------------|-----------------------|----------------|---------------|------------|
| Compounds                                                                                                                                                                             | Calibration curve     | r <sup>2</sup> | PLOQ (µg/1ml) | Recovery   |
| cyanidin 3-O-sambubioside                                                                                                                                                             | y=0.000026945*x+0.978 | 0.999          | 1.83          | 99.3±7.4   |
| cyanidin 3-O-glucoside                                                                                                                                                                | y=0.00001275*x-0.0759 | 0.999          | 3.71          | 128.5±10.4 |
